# Supplementary material for: Conformational control over π-conjugated electron pairing in 1D organic polymers
Source: Royal Society of Chemistry journal article supplement (doi:10.1039/d1ra03187b), 2021-01-01
Supplement: d1ra03187b1.pdf [file d1ra03187b1.pdf]

## Electronic Supplementary Information

### Conformational control over $\pi$ -conjugated electron pairing in 1D organic polymers

Isaac Alcón<sup>1\*</sup>, Jingjing Shao<sup>1</sup>, Jean-Christophe Tremblay<sup>2</sup> and Beate Paulus<sup>1</sup>

<sup>1</sup>*Institut für Chemie und Biochemie, Physikalische und Theoretische Chemie, Freie Universität Berlin, Arnimallee 22, 14195 Berlin, Germany*

<sup>2</sup>*Laboratoire de Physique et Chimie Théoriques, CNRS-Université de Lorraine, UMR 7019, ICPM, 57070 Metz, France*

\*Corresponding author: [ialcon8@gmail.com](mailto:ialcon8@gmail.com)

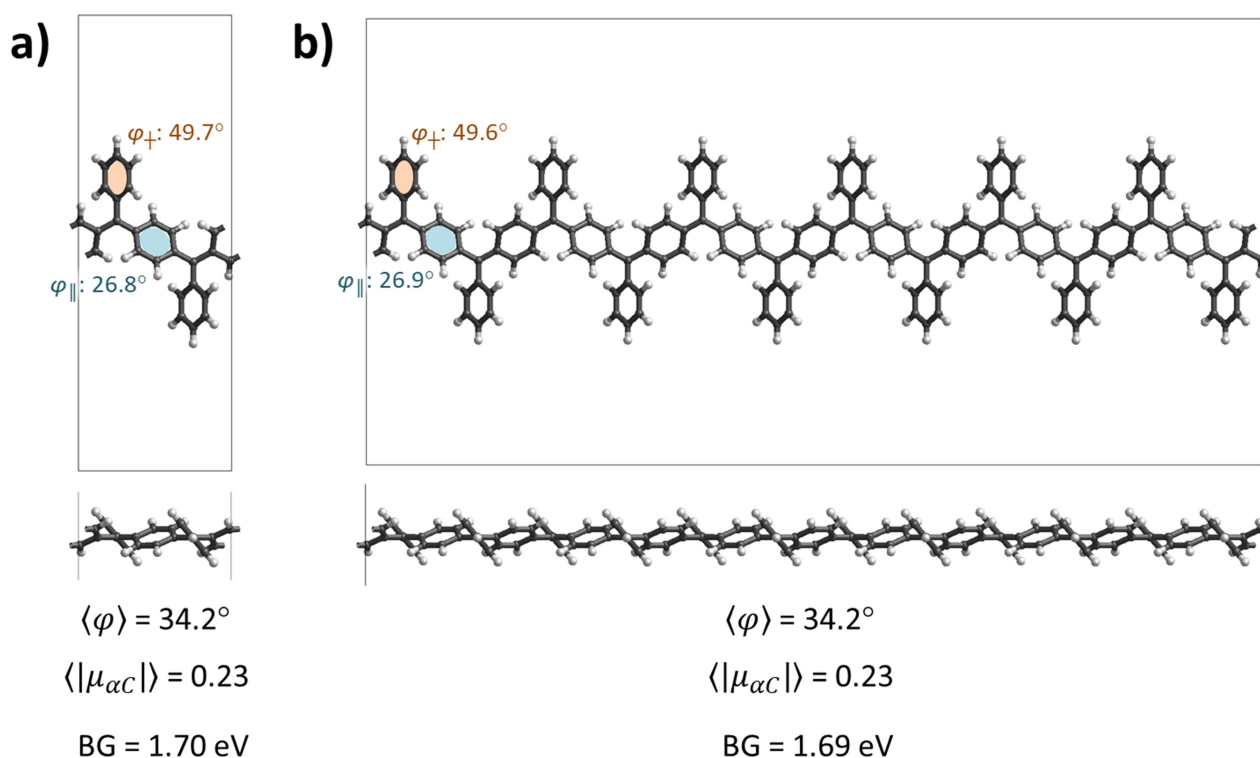

**Fig. S1.** Comparison of structural and electronic properties for the p-TPM polymer (most flexible considered polymer) obtained upon using **a)** the smallest periodic unit cell utilized throughout our study and **b)** the associated x6 supercell. Both systems were optimized using the settings specified in the Methods section in the main text, except for the smaller k-mesh for the x6 supercell due to its larger size (3 1 1 instead 18 1 1). Some resulting characteristic twist angles for perpendicular ( $\varphi_{\perp}$ , orange) and parallel aryl rings ( $\varphi_{\parallel}$ , blue) to the polymeric direction are provided. Key quantities such as the overall mean dihedral angle ( $\langle \varphi \rangle$ ), the average of the absolute  $\alpha$ C spin population ( $\langle |\mu_{\alpha C}| \rangle$ ) and the electronic band gap (BG) are also provided for both cases at the bottom. As it may be seen, no apparent new distortions appear for the larger system, leading to almost identical structural and electronic properties for both periodic representations.

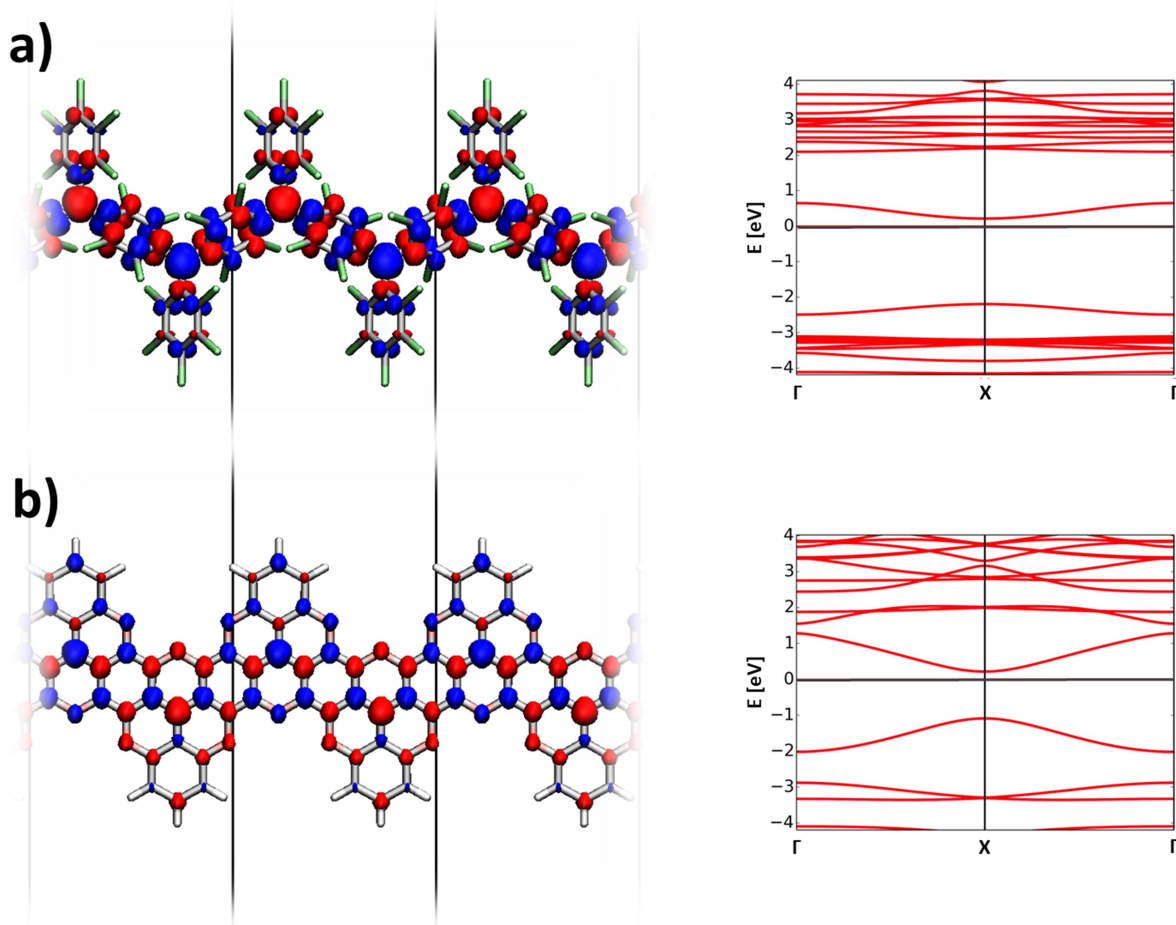

**Fig. S2.** (left) Spin density isosurface (spin up: blue, spin down: red; iso-surface value: 0.003 e/bohr<sup>3</sup>) and (right) associated band structure in the open-shell multi-radical solution for **a)** the p-PTM and **b)** p-oxTAM polymers. Vertical lines indicate the periodic unit cell along the polymer direction. In the band structures the Fermi energy is marked with a black horizontal line.

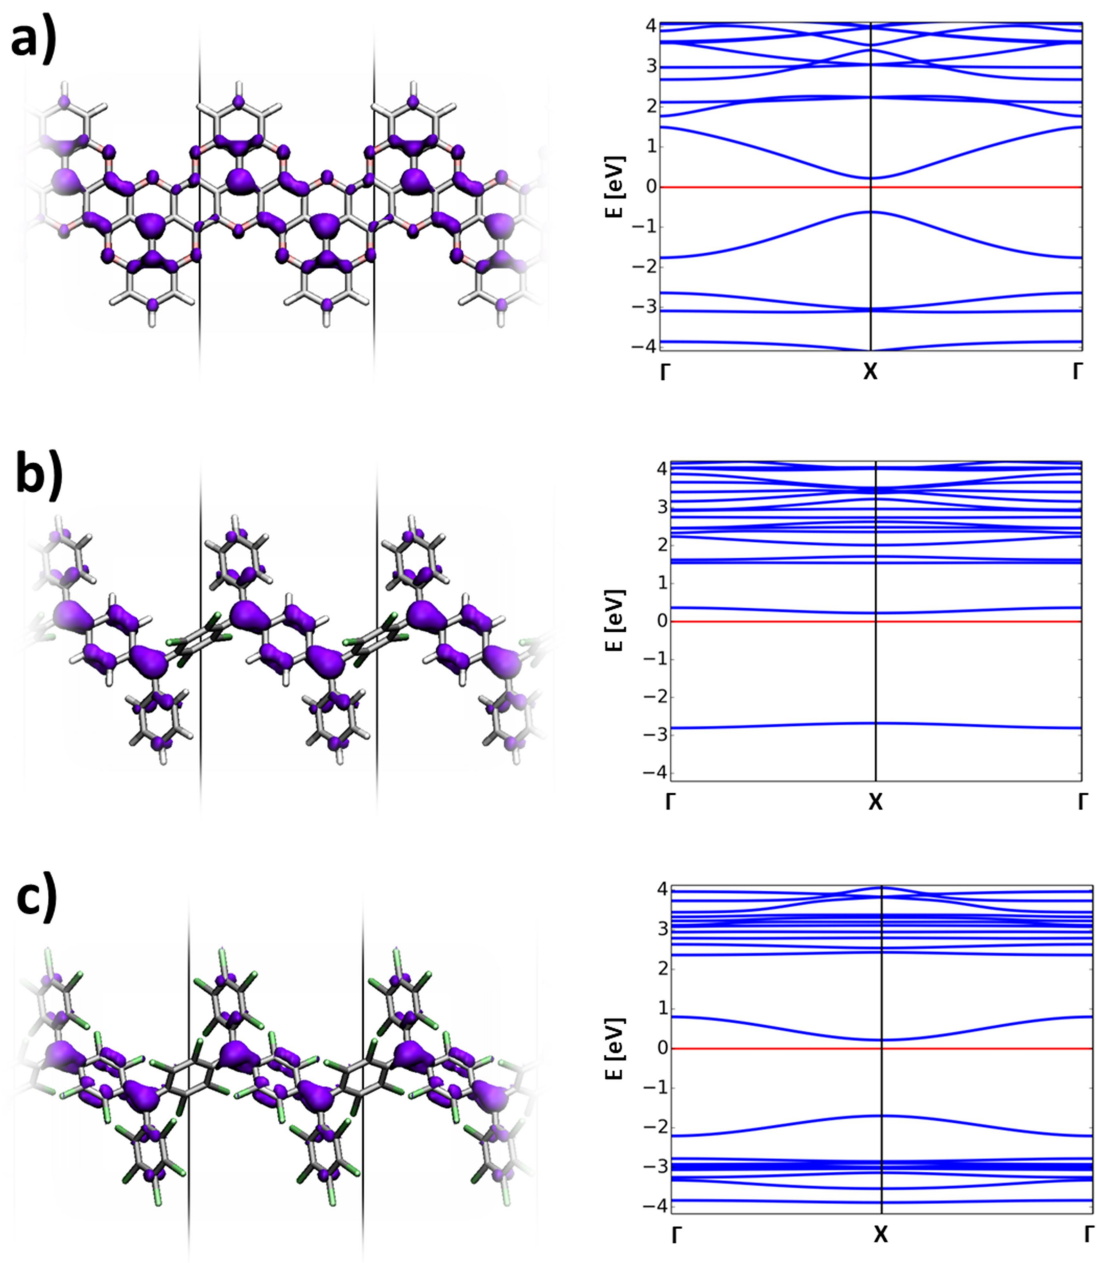

**Fig. S3.** (left) Highest occupied crystal orbital density (purple; iso-surface value:  $0.002 \text{ e/bohr}^3$ ) and (right) associated band structure in the closed-shell quinoidal solution for **a)** p-oxTAM, **b)** p-BCM and **c)** p-PTM. Vertical lines indicate the periodic unit cell along the polymer direction. In the band structures the Fermi energy is marked with a red horizontal line.

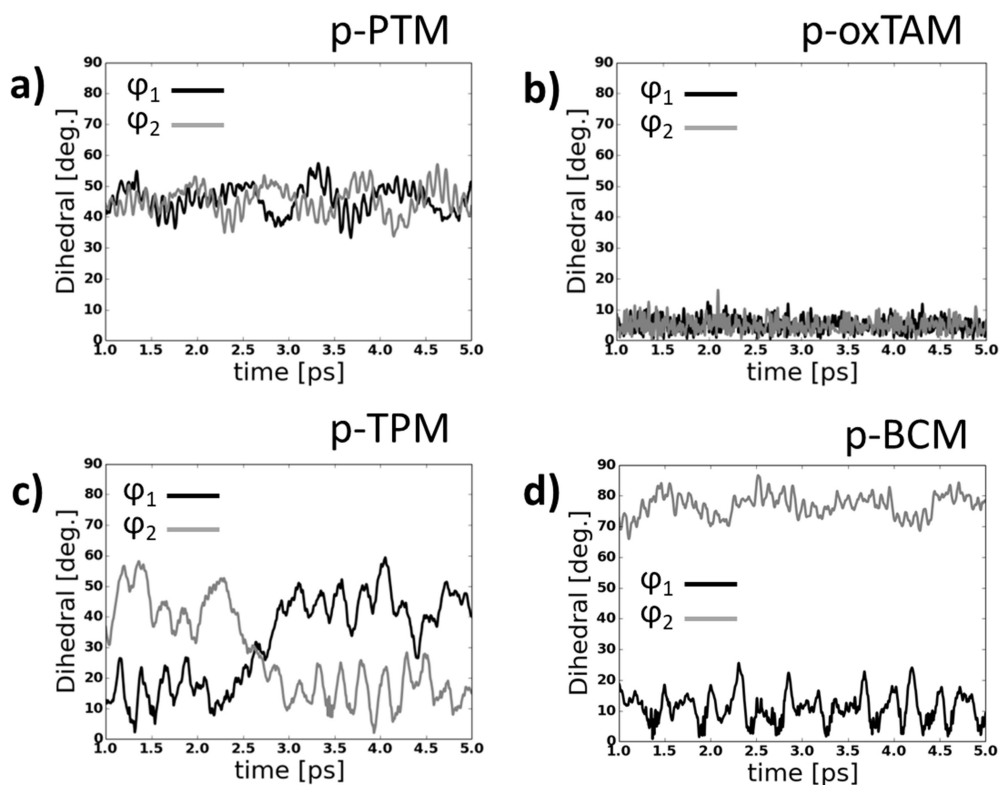

**Fig. S4.** Variation of the dihedral angles of aryl rings 1 and 2 ( $\varphi_1$ ,  $\varphi_2$  in the main text) during 4 ps of a molecular dynamics at 300 K for **a)** p-PTM, **b)** p-oxTAM, **c)** p-TPM and **d)** p-BCM polymers.

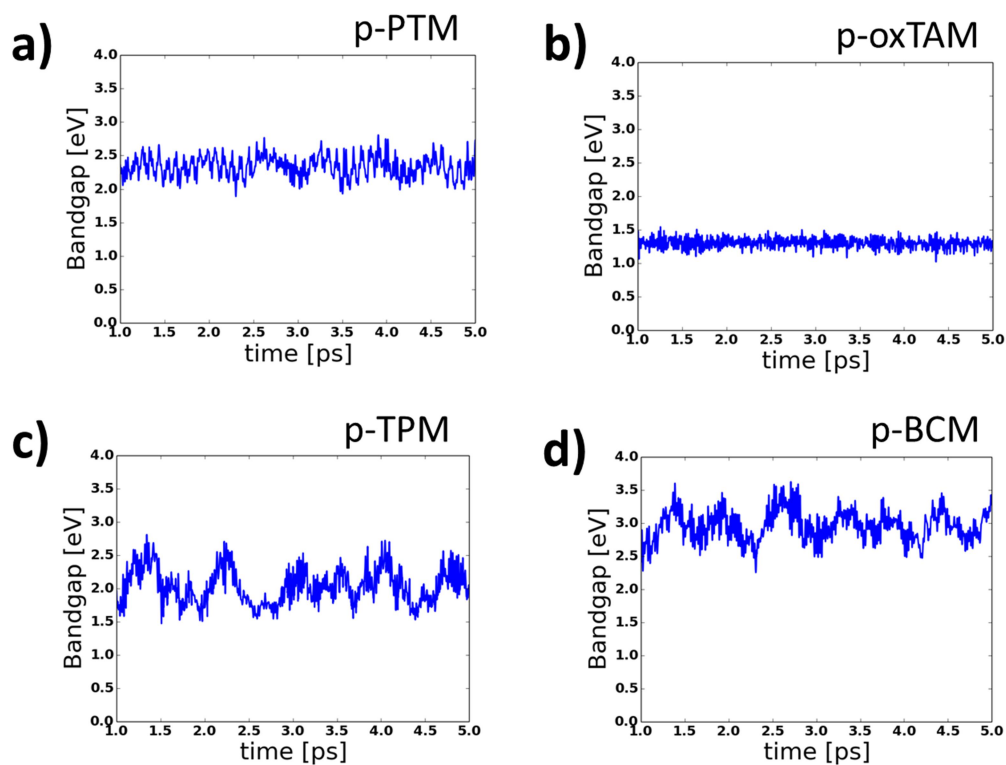

**Fig. S5.** Variation of the electronic bandgap during 4 ps of a molecular dynamics at 300 K for **a)** p-PTM, **b)** p-oxTAM, **c)** p-TPM and **d)** p-BCM polymers.

## Optimized geometries shown in Fig. 2 of the main text (FHI-AIMS format)

### Optimized geometry for the p-oxTAM 1D polymer

|                |            |             |               |
|----------------|------------|-------------|---------------|
| lattice_vector | 9.55603583 | 0.00000000  | 0.00000000    |
| lattice_vector | 0.00000000 | 30.00000000 | 0.00000000    |
| lattice_vector | 0.00000000 | 0.00000000  | 50.00000000   |
| atom           | 9.53211085 | 16.43468503 | 24.98411330 C |
| atom           | 9.53820825 | 17.80375549 | 24.97022505 O |
| atom           | 0.22170052 | 20.39979956 | 24.93806621 H |
| atom           | 1.19776204 | 14.28512312 | 25.00801109 C |
| atom           | 1.17405018 | 15.69287384 | 24.99259612 C |
| atom           | 1.17345344 | 18.48449365 | 24.96108979 C |
| atom           | 1.16168260 | 19.86655676 | 24.94398040 C |
| atom           | 2.38150333 | 13.59956265 | 25.01597834 O |
| atom           | 2.38126906 | 16.37854234 | 24.98518994 C |
| atom           | 2.38137441 | 17.79404400 | 24.96909153 C |
| atom           | 2.38152632 | 20.53759386 | 24.93470503 C |
| atom           | 2.38187188 | 21.61943158 | 24.92129605 H |
| atom           | 3.58945819 | 18.48406893 | 24.95978587 C |
| atom           | 3.60106924 | 19.86620189 | 24.94207971 C |
| atom           | 3.58870712 | 15.69308569 | 24.99182325 C |
| atom           | 3.56521465 | 14.28519596 | 25.00693796 C |
| atom           | 4.54112638 | 20.39930368 | 24.93489489 H |
| atom           | 4.78097615 | 17.80389400 | 24.96883872 O |
| atom           | 4.78684403 | 16.43466424 | 24.98304292 C |
| atom           | 4.75411365 | 13.60212774 | 25.01366773 C |
| atom           | 4.76017115 | 12.23296192 | 25.02802404 O |
| atom           | 5.97574653 | 15.75171505 | 24.99028874 C |
| atom           | 5.95217078 | 14.34379232 | 25.00547970 C |
| atom           | 5.00006543 | 9.63690568  | 25.05852901 H |
| atom           | 5.95158621 | 11.55239216 | 25.03672611 C |
| atom           | 5.93994839 | 10.17030812 | 25.05276548 C |
| atom           | 7.15980534 | 8.41730613  | 25.07343302 H |
| atom           | 7.15970450 | 9.49915250  | 25.06097729 C |
| atom           | 7.15951359 | 12.24275640 | 25.02912640 C |
| atom           | 7.15951271 | 13.65825132 | 25.01289519 C |
| atom           | 8.37937552 | 10.17050210 | 25.05356754 C |
| atom           | 8.36754279 | 11.55255775 | 25.03700610 C |
| atom           | 9.31939308 | 9.63732271  | 25.05956961 H |

|      |            |             |             |   |
|------|------------|-------------|-------------|---|
| atom | 0.00282720 | 12.23302719 | 25.02815846 | O |
| atom | 7.15941714 | 16.43739430 | 24.98233340 | O |
| atom | 8.36681286 | 14.34391568 | 25.00575451 | C |
| atom | 8.34313134 | 15.75174219 | 24.99058161 | C |
| atom | 0.00882915 | 13.60213952 | 25.01444390 | C |

Optimized geometry for the p-TPM 1D polymer

|                |             |             |             |   |
|----------------|-------------|-------------|-------------|---|
| lattice_vector | 10.04688270 | 0.00000000  | 0.00000000  |   |
| lattice_vector | 0.00000000  | 30.00000000 | 0.00000000  |   |
| lattice_vector | 0.00000000  | 0.00000000  | 50.00000000 |   |
| atom           | 9.94956511  | 13.82478100 | 24.90680604 | C |
| atom           | 9.86597711  | 12.84680671 | 24.45067094 | H |
| atom           | 8.93914881  | 15.73445667 | 25.97913674 | C |
| atom           | 8.78542277  | 14.43075958 | 25.44218319 | C |
| atom           | 8.09402609  | 16.20529878 | 26.46338562 | H |
| atom           | 8.90398587  | 12.11201001 | 27.10030882 | H |
| atom           | 8.89522133  | 9.64538243  | 27.13140589 | H |
| atom           | 8.30800010  | 11.56233295 | 26.38211974 | C |
| atom           | 8.30067423  | 10.17669286 | 26.39869076 | C |
| atom           | 7.53350342  | 13.74507635 | 25.44486578 | C |
| atom           | 7.53384435  | 12.27116594 | 25.45708086 | C |
| atom           | 7.52932418  | 9.47098296  | 25.48372413 | C |
| atom           | 7.52731884  | 8.38832075  | 25.49430181 | H |
| atom           | 6.76078282  | 10.16141455 | 24.55488594 | C |
| atom           | 6.75845013  | 11.54713419 | 24.54476285 | C |
| atom           | 6.16435353  | 9.61822520  | 23.83244595 | H |
| atom           | 6.16408519  | 12.08487120 | 23.81624297 | H |
| atom           | 6.98137060  | 16.20080006 | 24.41202457 | H |
| atom           | 6.28476008  | 14.42928401 | 25.43704877 | C |
| atom           | 6.13393354  | 15.73270309 | 24.89477091 | C |
| atom           | 5.19604654  | 12.85037516 | 26.43039097 | H |
| atom           | 5.11544624  | 13.82568383 | 25.96822343 | C |
| atom           | 4.93087345  | 16.37967652 | 24.90145351 | C |
| atom           | 4.85023439  | 17.35492879 | 24.43917536 | H |
| atom           | 3.88662263  | 20.58560459 | 27.03905881 | H |
| atom           | 3.88441606  | 18.11901582 | 27.05430081 | H |
| atom           | 3.91238074  | 14.47267143 | 25.97491053 | C |
| atom           | 3.76160244  | 15.77619033 | 25.43286032 | C |

|      |            |             |             |   |
|------|------------|-------------|-------------|---|
| atom | 3.28911699 | 20.04332890 | 26.31682143 | C |
| atom | 3.29006917 | 18.65761145 | 26.32640263 | C |
| atom | 3.06493375 | 14.00450781 | 26.45757356 | H |
| atom | 2.52384008 | 21.81757923 | 25.37856191 | H |
| atom | 2.52070713 | 20.73491605 | 25.38872385 | C |
| atom | 2.51346574 | 17.93468368 | 25.41422871 | C |
| atom | 2.51300012 | 16.46076287 | 25.42555095 | C |
| atom | 1.95223170 | 14.00093408 | 24.40676203 | H |
| atom | 1.74796258 | 20.03032940 | 24.47407572 | C |
| atom | 1.73932396 | 18.64467657 | 24.49006383 | C |
| atom | 1.26093614 | 15.77537867 | 25.42818261 | C |
| atom | 1.10714965 | 14.47173523 | 24.89110622 | C |
| atom | 1.14236279 | 18.09586273 | 23.77202532 | H |
| atom | 1.15328037 | 20.56240498 | 23.74202660 | H |
| atom | 0.18038278 | 17.35930297 | 26.41979551 | H |
| atom | 0.09678505 | 16.38136961 | 25.96356264 | C |

Optimized geometry for the p-PTM 1D polymer

|                |           |           |           |    |
|----------------|-----------|-----------|-----------|----|
| lattice_vector | 10.040241 | 0.000000  | 0.000000  |    |
| lattice_vector | 0.000000  | 30.000000 | 0.000000  |    |
| lattice_vector | 0.000000  | 0.000000  | 50.000000 |    |
| atom           | 0.197327  | 16.063060 | 25.867894 | C  |
| atom           | 0.457956  | 17.263469 | 27.076446 | Cl |
| atom           | 0.765870  | 20.870264 | 22.953852 | Cl |
| atom           | 0.835925  | 17.798688 | 22.863514 | Cl |
| atom           | 1.022555  | 14.609788 | 24.143047 | C  |
| atom           | 1.257110  | 15.698792 | 25.010717 | C  |
| atom           | 1.737465  | 18.615225 | 24.083311 | C  |
| atom           | 1.728764  | 20.005785 | 24.082531 | C  |
| atom           | 2.200068  | 14.189673 | 22.955838 | Cl |
| atom           | 2.515740  | 16.417247 | 24.997031 | C  |
| atom           | 2.517546  | 17.886005 | 24.994818 | C  |
| atom           | 2.524739  | 20.704601 | 24.987986 | C  |
| atom           | 2.529170  | 22.418856 | 24.983770 | Cl |
| atom           | 2.831510  | 14.200858 | 27.048900 | Cl |
| atom           | 3.300960  | 18.615700 | 25.903169 | C  |
| atom           | 3.316972  | 20.006220 | 25.896968 | C  |
| atom           | 3.773838  | 15.698148 | 24.985692 | C  |

|      |          |           |           |    |
|------|----------|-----------|-----------|----|
| atom | 4.008555 | 14.613781 | 25.858990 | C  |
| atom | 4.197957 | 17.801081 | 27.127562 | Cl |
| atom | 4.284695 | 20.871262 | 27.021099 | Cl |
| atom | 4.572387 | 17.252481 | 22.911662 | Cl |
| atom | 4.833119 | 16.058099 | 24.126099 | C  |
| atom | 5.217549 | 13.942637 | 25.873014 | C  |
| atom | 5.477848 | 12.748876 | 27.088143 | Cl |
| atom | 6.042034 | 15.386810 | 24.139852 | C  |
| atom | 6.276980 | 14.302693 | 25.013523 | C  |
| atom | 7.218781 | 15.799391 | 22.949572 | Cl |
| atom | 5.858410 | 12.197649 | 22.871216 | Cl |
| atom | 5.768372 | 9.127753  | 22.983847 | Cl |
| atom | 6.751869 | 11.384597 | 24.099258 | C  |
| atom | 6.734022 | 9.994161  | 24.108671 | C  |
| atom | 7.515183 | 7.582810  | 25.030741 | Cl |
| atom | 7.522751 | 9.297059  | 25.021636 | C  |
| atom | 7.533992 | 12.115425 | 25.007815 | C  |
| atom | 7.535391 | 13.584234 | 25.002969 | C  |
| atom | 8.317851 | 9.997023  | 25.927032 | C  |
| atom | 8.311646 | 11.387588 | 25.922385 | C  |
| atom | 9.276875 | 9.133929  | 27.060008 | Cl |
| atom | 9.212386 | 12.206015 | 27.141504 | Cl |
| atom | 7.850560 | 15.812612 | 27.043449 | Cl |
| atom | 8.793951 | 14.302885 | 24.989247 | C  |
| atom | 9.028400 | 15.392051 | 25.856771 | C  |
| atom | 9.593821 | 12.736777 | 22.924887 | Cl |
| atom | 9.853894 | 13.938269 | 24.132424 | C  |

Optimized geometry for the p-BCM 1D polymer

|                |            |             |             |    |
|----------------|------------|-------------|-------------|----|
| lattice_vector | 9.82078953 | 0.00000000  | 0.00000000  |    |
| lattice_vector | 0.00000000 | 30.00000000 | 0.00000000  |    |
| lattice_vector | 0.00000000 | 0.00000000  | 50.00000000 |    |
| atom           | 0.45327810 | 15.65130758 | 26.39131792 | C  |
| atom           | 1.03949056 | 16.39553057 | 27.83183954 | Cl |
| atom           | 0.49886100 | 20.37989115 | 23.77422858 | H  |
| atom           | 0.74780413 | 17.93847311 | 23.80714936 | H  |
| atom           | 0.75451368 | 15.08725802 | 24.08538145 | C  |
| atom           | 1.22759909 | 15.72637153 | 25.23344890 | C  |



|      |            |             |             |    |
|------|------------|-------------|-------------|----|
| atom | 1.40191876 | 18.55053339 | 24.41520236 | C  |
| atom | 1.26221621 | 19.92803722 | 24.39500351 | C  |
| atom | 1.66881022 | 15.18569602 | 22.62457725 | Cl |
| atom | 2.50865853 | 16.47663944 | 25.22741341 | C  |
| atom | 2.38937971 | 17.94059598 | 25.19702583 | C  |
| atom | 2.09444890 | 20.72619359 | 25.16852931 | C  |
| atom | 1.98067979 | 21.80274395 | 25.15857421 | H  |
| atom | 2.77885533 | 13.85627563 | 25.71648926 | H  |
| atom | 3.20507794 | 18.75631724 | 25.99027175 | C  |
| atom | 3.06120133 | 20.13320347 | 25.97032706 | C  |
| atom | 3.68722270 | 15.78117976 | 25.24403290 | C  |
| atom | 3.71046103 | 14.35497968 | 25.48312362 | C  |
| atom | 3.92701949 | 18.29900174 | 26.65444751 | H  |
| atom | 3.69584722 | 20.74565516 | 26.59857834 | H  |
| atom | 4.99795058 | 17.45171298 | 24.74873806 | H  |
| atom | 4.96880069 | 16.40085873 | 25.00052601 | C  |
| atom | 4.85271148 | 13.64497714 | 25.49062301 | C  |
| atom | 4.82356842 | 12.59412494 | 25.74241946 | H  |
| atom | 6.11105173 | 15.69085623 | 25.00803158 | C  |
| atom | 6.13428494 | 14.26465455 | 25.24710432 | C  |
| atom | 7.04266045 | 16.18956433 | 24.77468440 | H  |
| atom | 5.89443887 | 11.74692741 | 23.83659783 | H  |
| atom | 6.12559841 | 9.30026624  | 23.89231697 | H  |
| atom | 6.61638606 | 11.28956342 | 24.50073377 | C  |
| atom | 6.76025428 | 9.91267647  | 24.52059823 | C  |
| atom | 7.84079728 | 8.24308771  | 25.33221943 | H  |
| atom | 7.72703550 | 9.31963896  | 25.32232508 | C  |
| atom | 7.43210580 | 12.10523144 | 25.29400943 | C  |
| atom | 7.31284060 | 13.56918351 | 25.26368879 | C  |
| atom | 8.55928375 | 10.11774524 | 26.09588643 | C  |
| atom | 8.41958250 | 11.49525013 | 26.07577567 | C  |
| atom | 9.32266089 | 9.66585045  | 26.71660414 | H  |
| atom | 9.07371716 | 12.10727590 | 26.68384120 | H  |
| atom | 8.15269777 | 14.86000775 | 27.86652776 | Cl |
| atom | 8.59390073 | 14.31943414 | 25.25766026 | C  |
| atom | 9.06699188 | 14.95852391 | 26.40573224 | C  |
| atom | 8.78198555 | 13.65024478 | 22.65929889 | Cl |
| atom | 9.36822006 | 14.39448934 | 24.09979452 | C  |
